# Supplementary material for: Universal strategy towards high–energy aqueous multivalent ion batteries
Source: Research Square preprint supplement (doi:10.21203/rs.3.rs-140085/v1), 2021-01-18
Supplement: Supplementary file 1 [file 300c313724feb84fcf9d6d0b.docx]

**Supplementary Information**

**Universal strategy towards high–energy aqueous multivalent ion batteries**

Tang *et al.*

**Supplementary Figures**


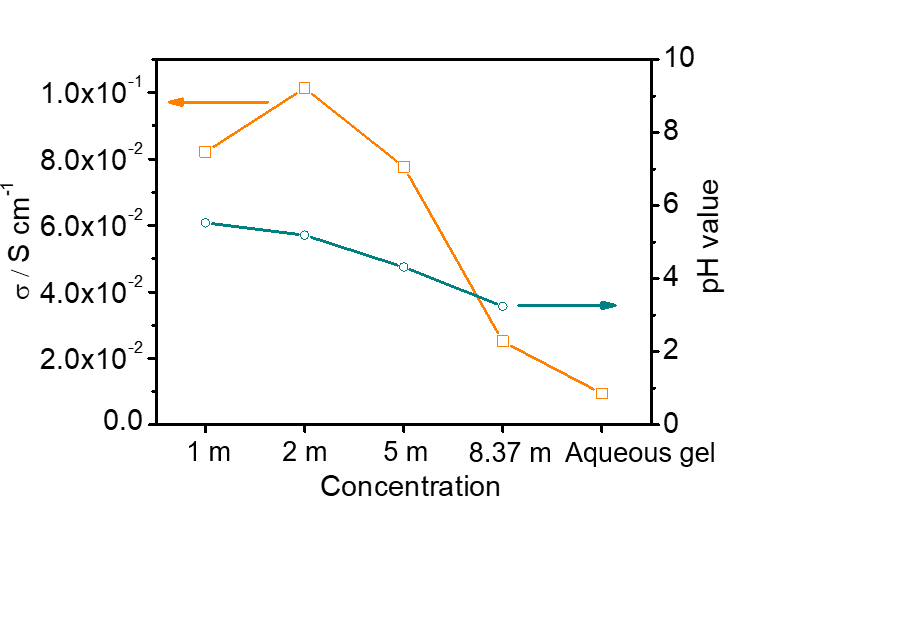


**Supplementary Figure 1**. The electrochemical conductivities and pH values of the 1 m, 2 m, 5 m, Sat. (8.37 m) Ca(NO3)2 aqueous solutions, and gel electrolyte.


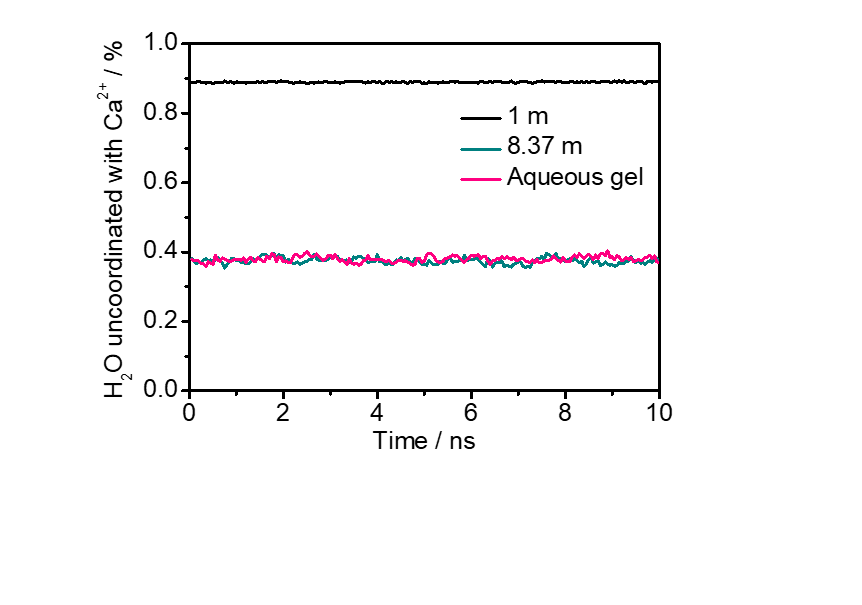


**Supplementary Figure 2**. The percentage of water molecular uncoordinated with Ca2+ in the three electrolyte samples based on MD simulation.


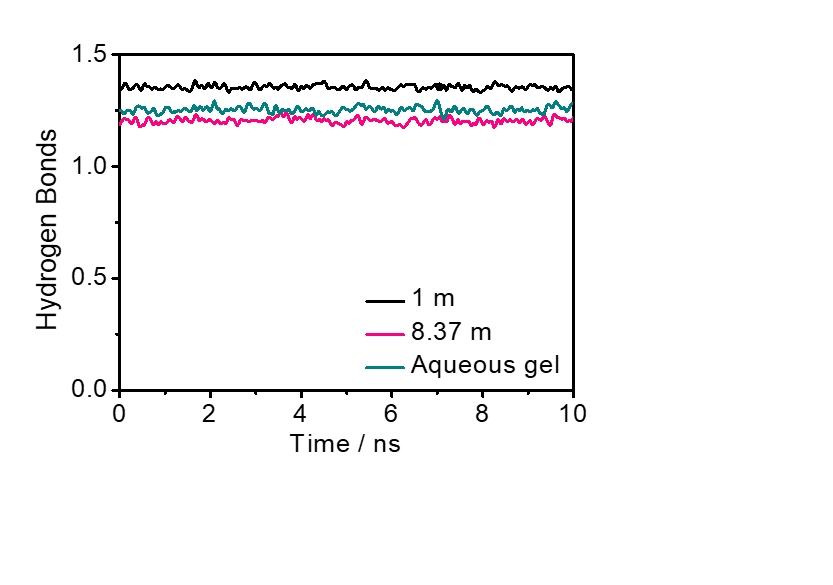


**Supplementary Figure 3**. The hydrogen bonds of the three electrolyte samples based on MD simulation.


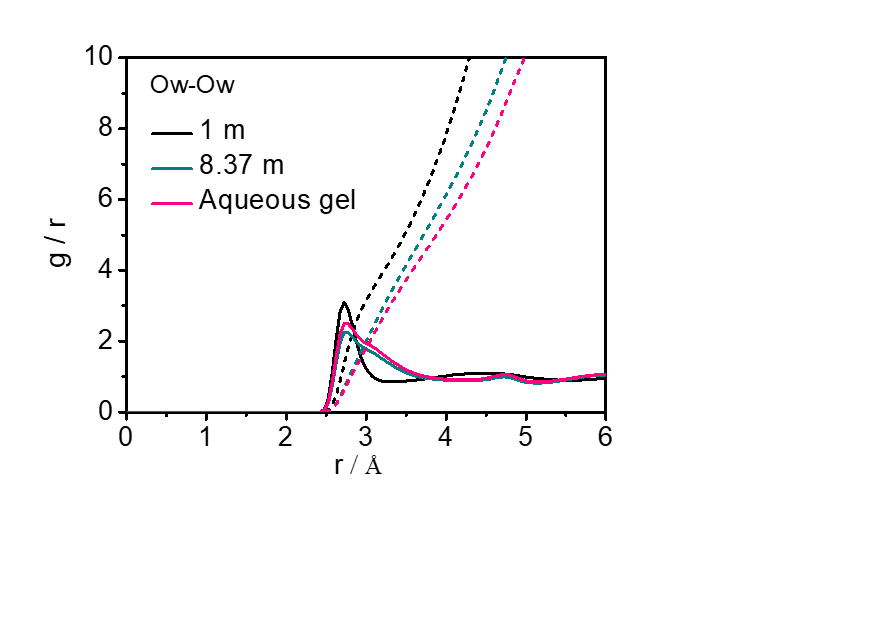


**Supplementary Figure 4.** The radial distribution functions (solid line) and its number integral (dash line) of the distance between two oxygen atoms in water molecules in different electrolytes.

Supplementary Fig. 4 shows the radial distribution functions of distance between two oxygen atoms in water molecules in different electrolytes. It can be observed that a sharp peak located at ≈2.75 Å in dilute solution represents the d(Ow–Ow) between two nearest water molecules connected by a hydrogen bond, while this peak become broader and weaker in Sat. solution and gel electrolyte, which means the two nearest water molecules may be coordinated with a Ca2+ ion to form a Ca2+–H2O complex.


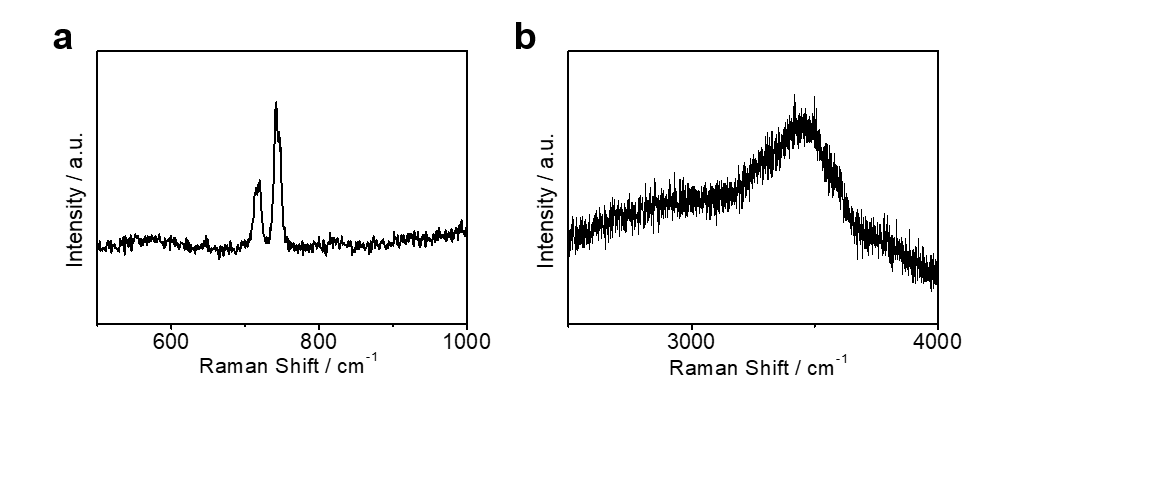


**Supplementary Figure 5**. The Raman spectra of the crystalline Ca(NO3)2·4H2O.


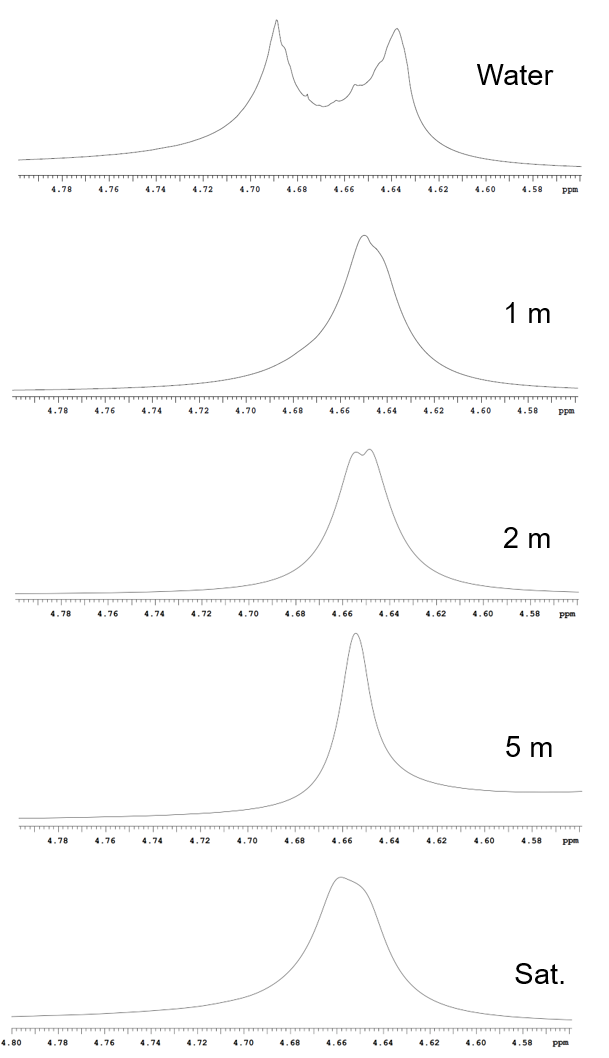


**Supplementary Figure 6**. 1H NMR of the pure water, 1 m, 2 m, 5 m, Sat. Ca(NO3)2 aqueous solutions.


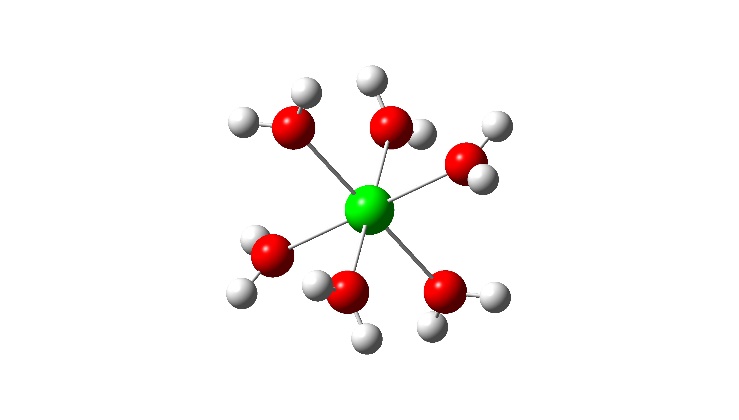


**Supplementary Figure 7.** DFT calculation of the binding energy between one water molecule and Ca2+.

The average binding energy between one water molecule and Ca2+ is about 0.78 eV, while the average water–water binding energy is only about 0.27 eV[1](#_ENREF_1). Therefore, the water molecules are preferentially bonded by Ca2+, which significantly decrease the free water molecules and increase Ca2+–OH (water oxygen) interaction. This result is well consistent with the 1H NMR spectra in Supplementary Fig. 6.


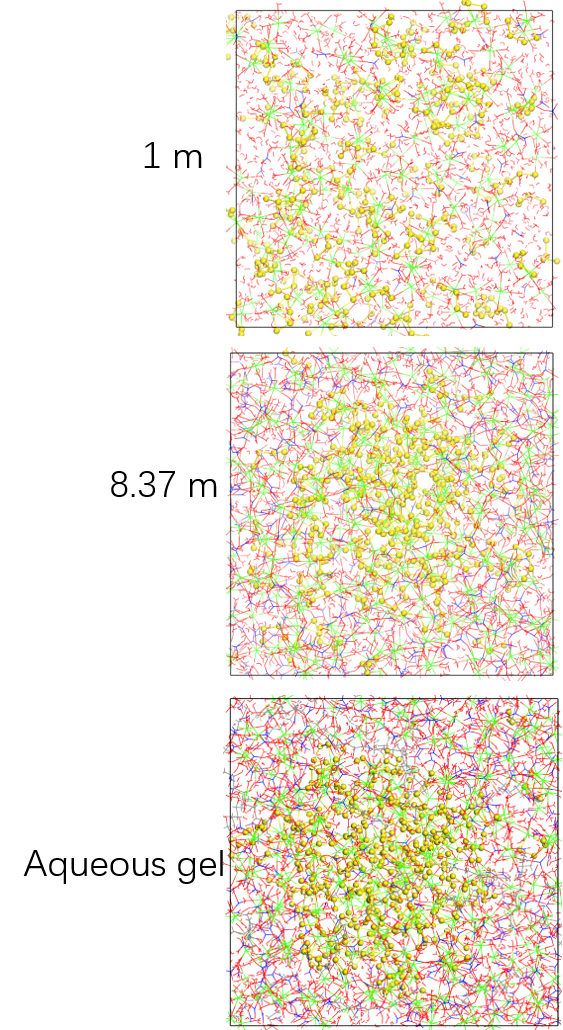


**Supplementary Figure 8**. Snapshots of CaS4 diffusion in 1 m, Saturated Ca(NO3)2 solution, and gel electrolyte based on MD simulation in 5 ns.


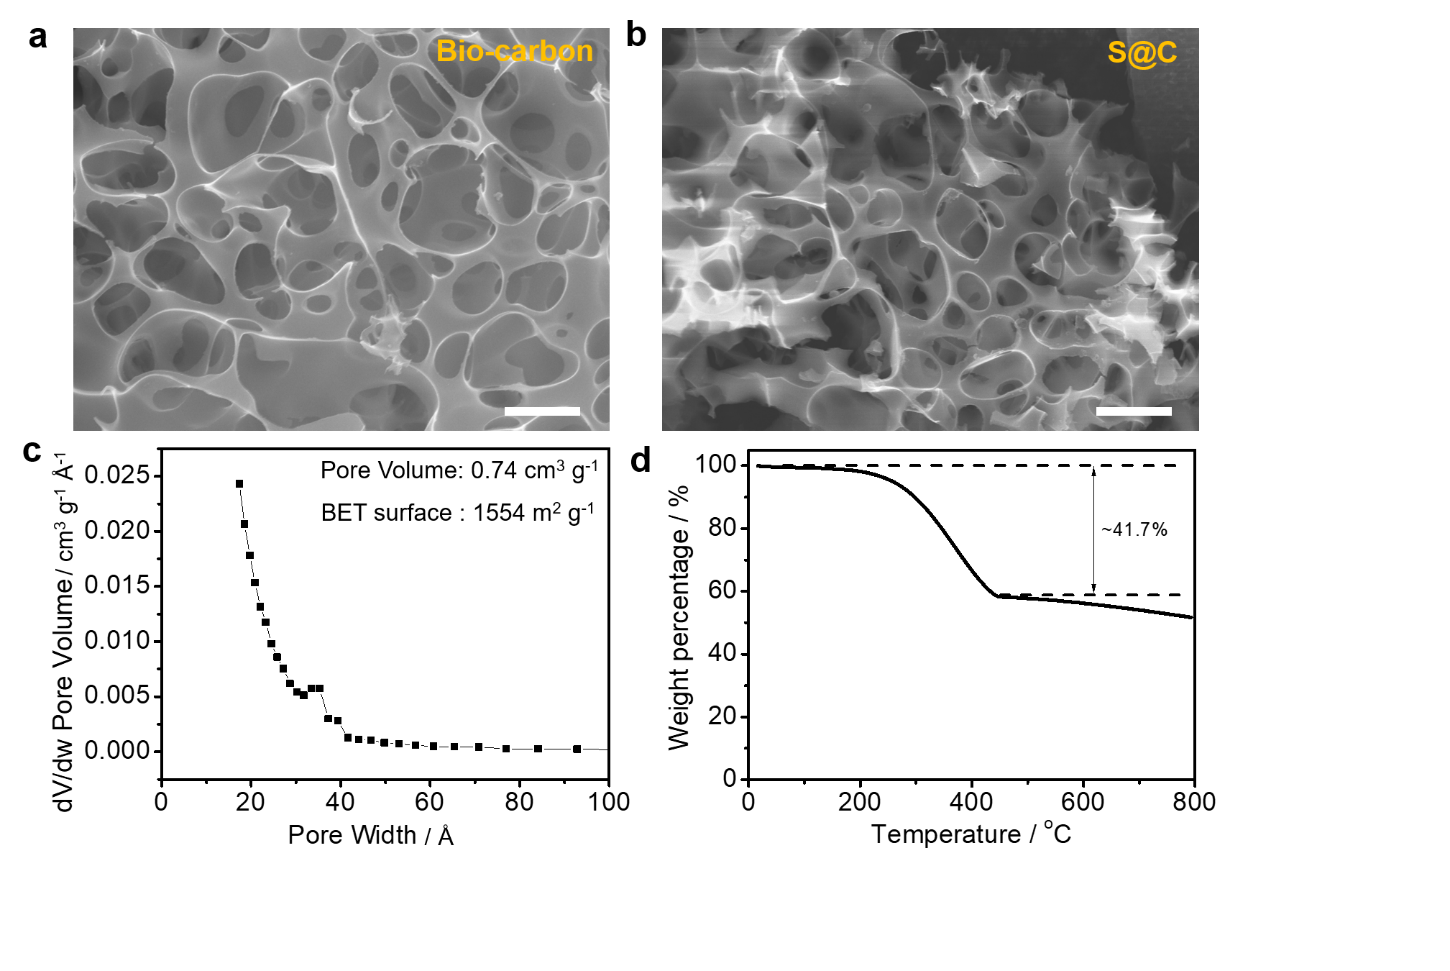


**Supplementary Figure 9**. Scanning electron microscope (SEM) images of **a** biomass–derived porous carbon host and **b** S@C composite. Scale bars are 2 μm in Supplementary Fig. 9a–b. **c** Pore distribution of the porous carbon host. **d** The thermogravimetry analysis (TGA) curve of the S@C composite under N2 flow.

The sulfur loading in the S@C was set as ≈40 wt% (Supplementary Fig. 9d), which is close to the maximum loading value (48 wt%) that guarantees the CaS as reaction product fully confined in the carbon host (considering the density of CaS is 2.83 g cm–3 and the pore volume of porous carbon is 0.74 cm3 g–1 according to the BET results).


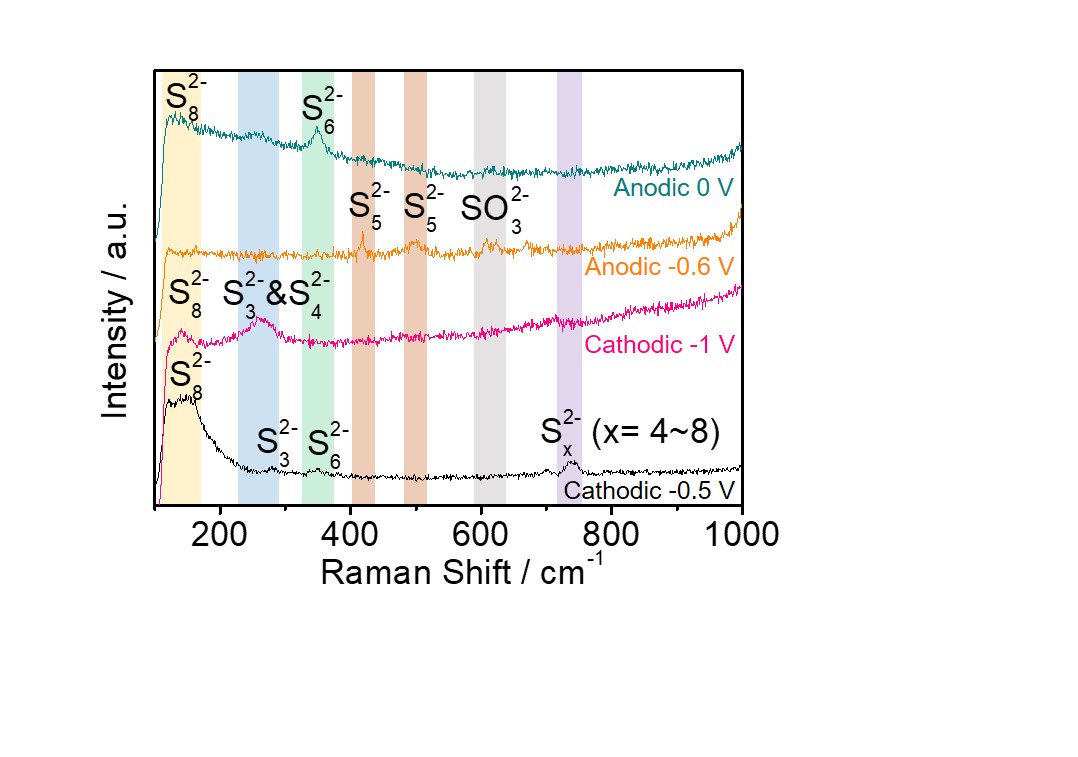


**Supplementary Figure 10**. *Ex situ* Raman spectra of the S@C electrodes at different discharge/charge states corresponding to Fig. 3c.


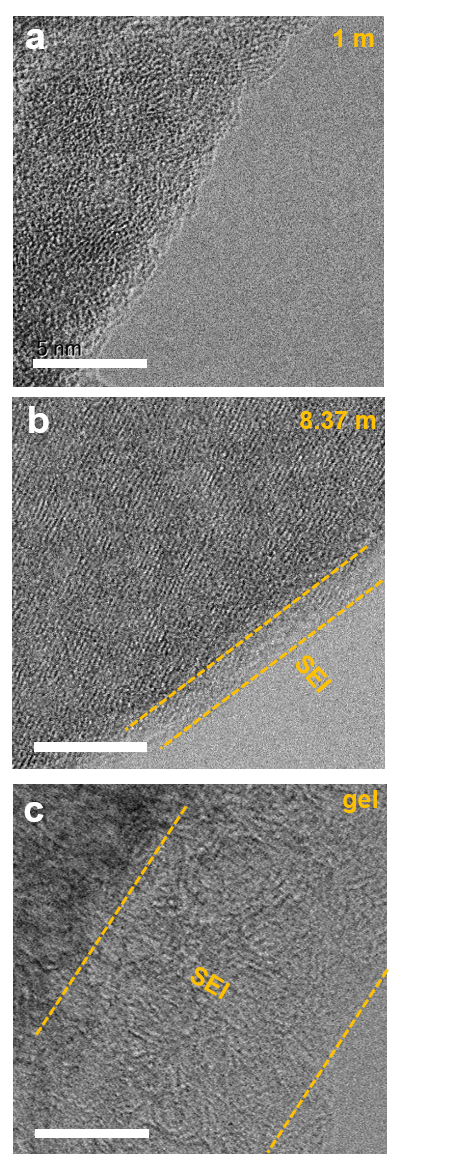


**Supplementary Figure 11**. HADDF–STEM images of the S@C electrode after a CV scanning in **a** 1 m, **b** 8.37 m Ca(NO3)2 aqueous electrolytes, and **c** aqueous gel electrolyte. The scale bars are 10 nm in Supplementary Fig. 11a–c.


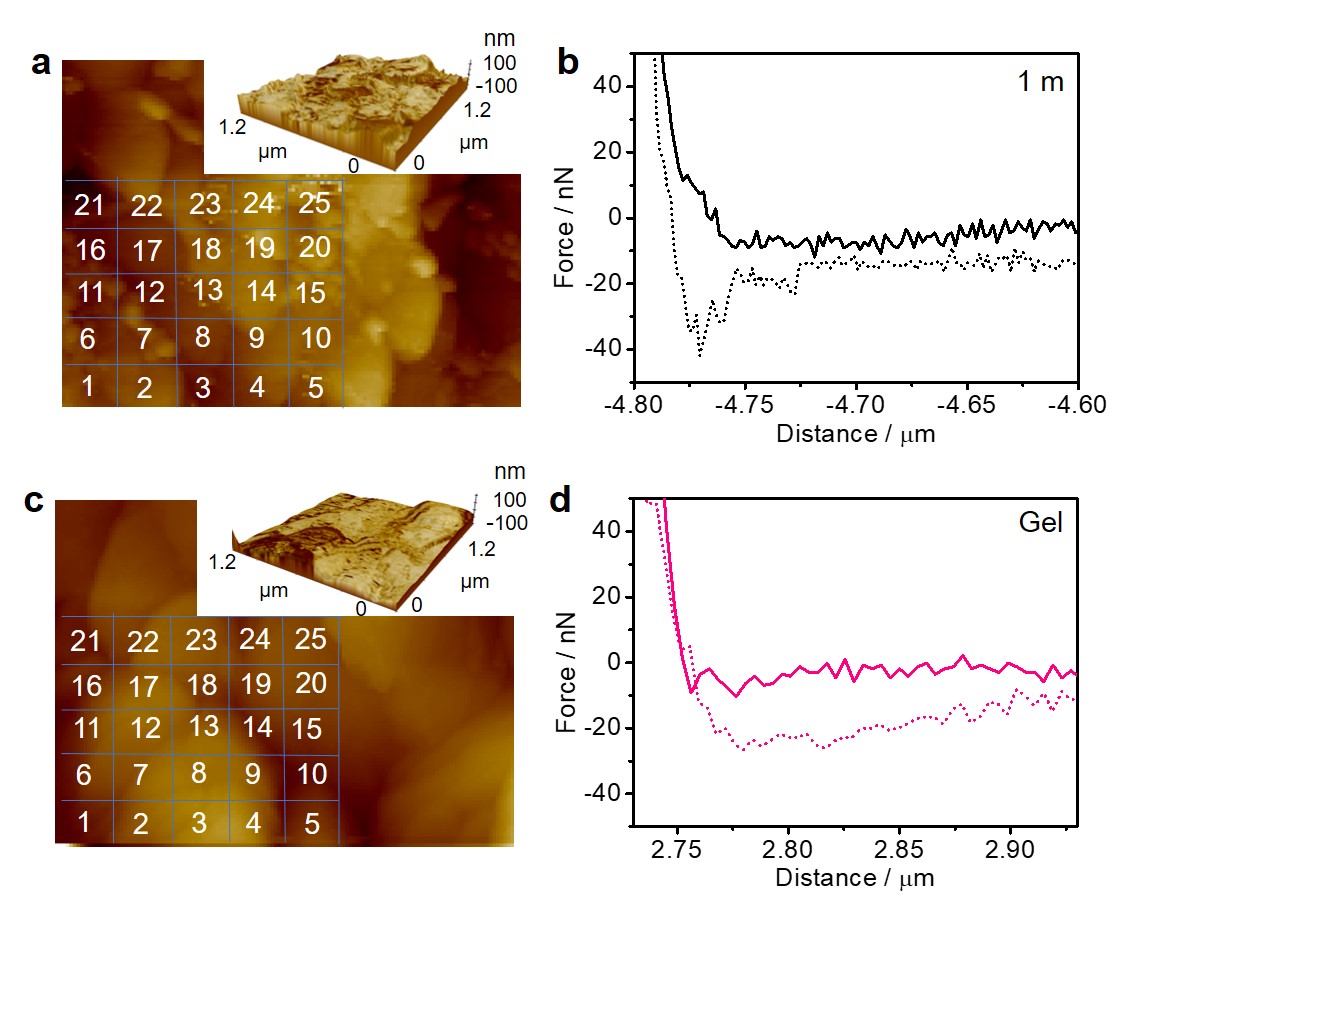


**Supplementary Figure 12**. **a** The AFM scanning images of S@C anodes tested in 1 m Ca(NO3)2 electrolyte. The corresponding three–dimensional AFM scanning images is shown in inset. **b** The corresponding force−displacement plots of area 18 in supplementary Fig. 12a. **c** The AFM scanning images of S@C anodes tested in aqueous gel electrolyte. The corresponding three–dimensional AFM scanning image is shown in inset. **d** The corresponding force−displacement plots of area 18 in supplementary Fig. 12c.


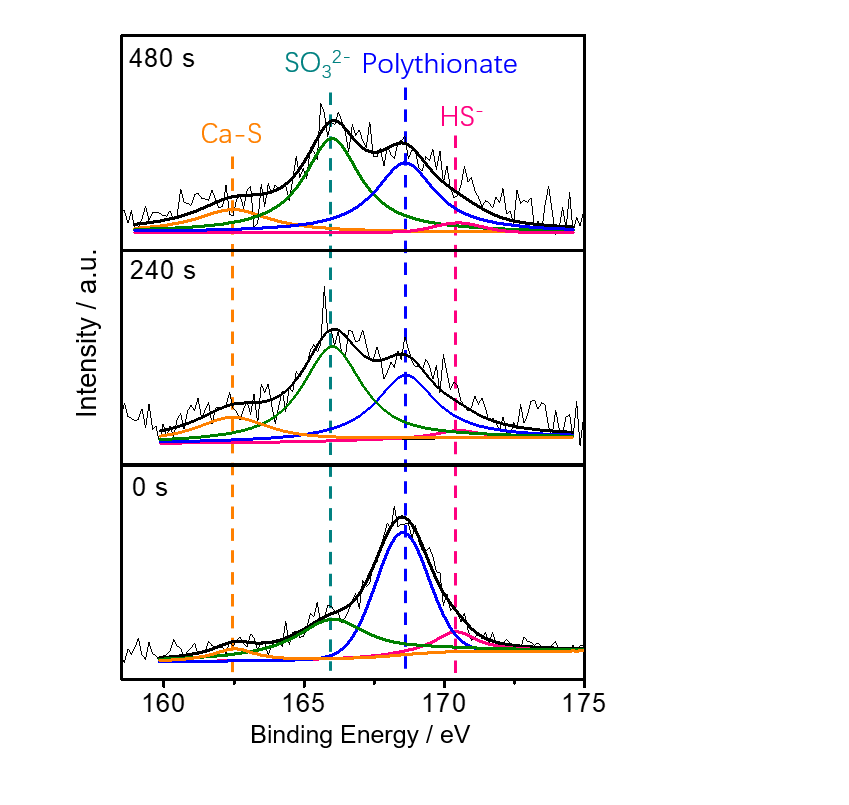


**Supplementary Figure 13**. The in–depth S 2p XPS of the S@C anode after the cathodic CV scanning process.

As can be seen from Supplementary Fig. 13, the S 2p XPS spectra can be fitted into four peaks at 162.3, 166.3, 168.2, 170.7 eV, which can be attributed to the CaS, SO32–, polythionate complex, and HS–, respectively[2-4](#_ENREF_2). Particularly, the polythionate complex and SO32– may result from the interfacial chemistry.


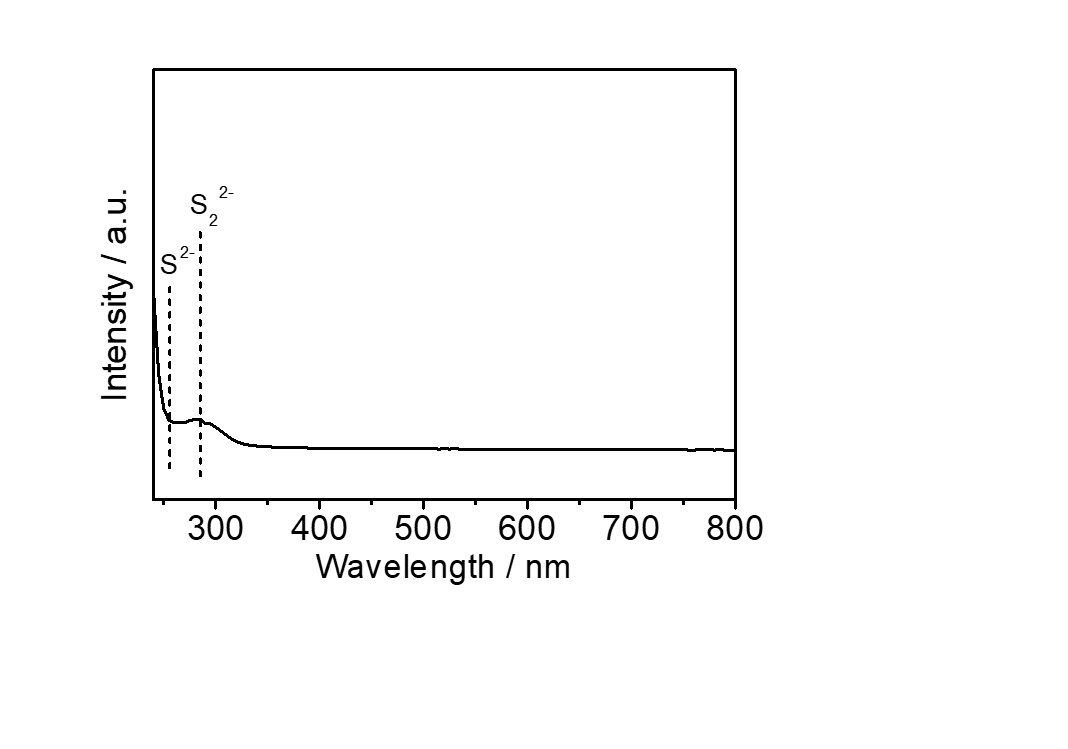


**Supplementary Figure 14**. The UV–vis spectrum of the sulfur electrode after cathodic scanning process. The as–obtained sulfur electrode was washed with 1,3–Dioxolane (DOL), and the DOL/calcium polysulfides mixture was collected for UV–vis characterization.

As shown in Supplementary Fig. 14, various Ca polysulfides (S2− and S22− at 220~280 nm[5](#_ENREF_5)) appear in the UV–Vis spectrum of DOL/Ca polysulfides mixture, which is highly consistent with the Raman and in–depth S 2p XPS spectra results.


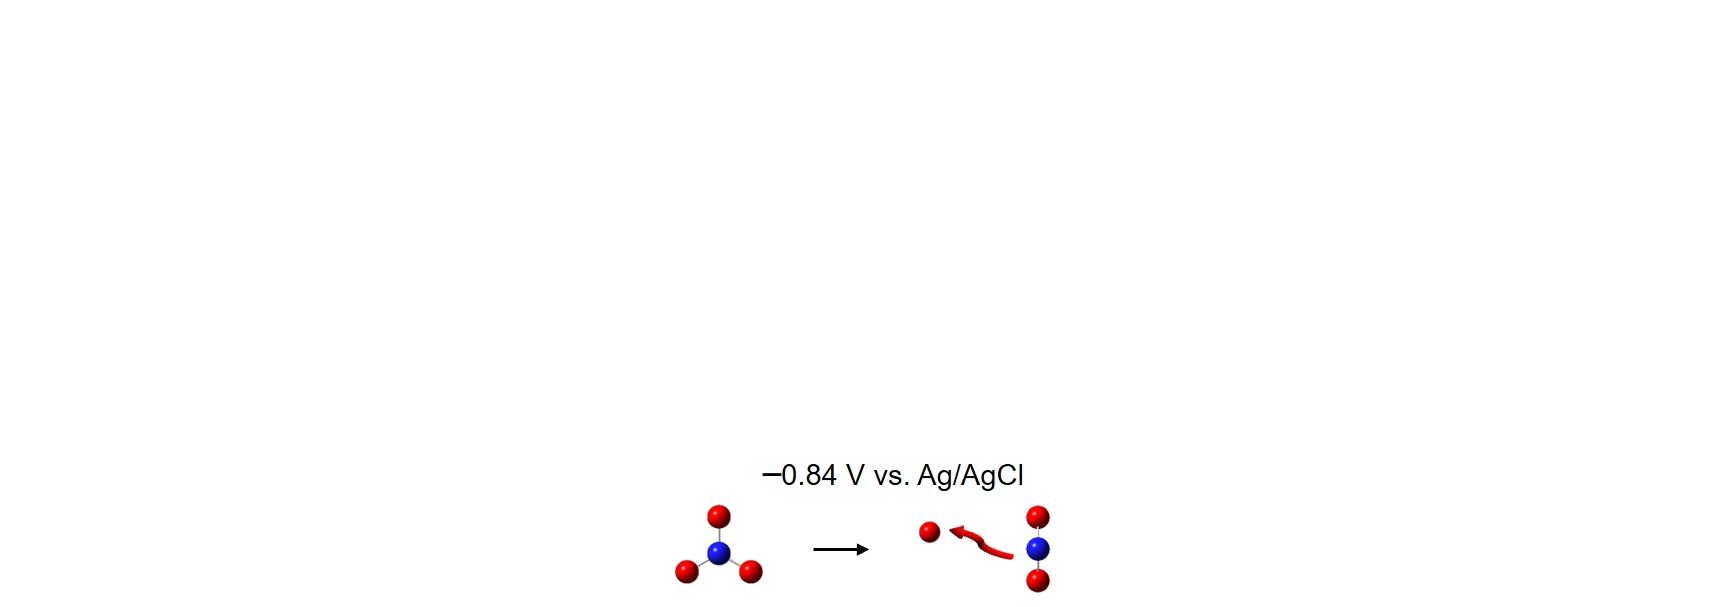


**Supplementary Figure 15.** The DFT calculations of reduction of isolated NO3–.


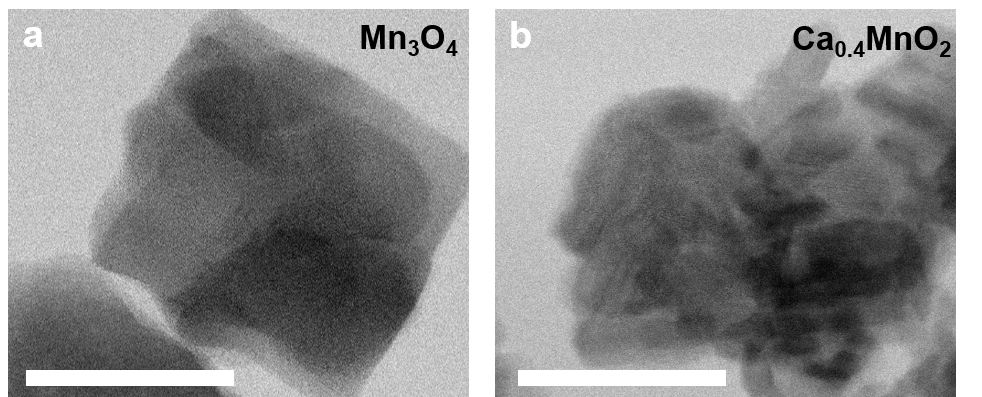


**Supplementary Figure 16.** The TEM images of the as–prepared **a** Mn3O4 precursor and **b** Ca0.4MnO2 cathode material. Scale bars: 50 nm.


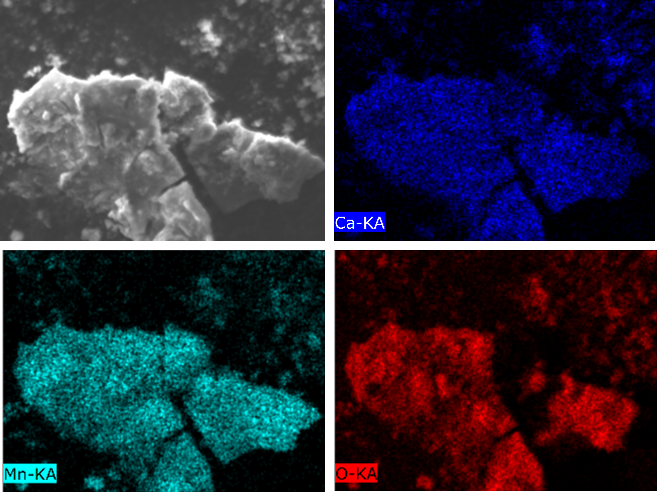


**Supplementary Figure 17.** The elemental mapping of Ca, Mn, O in the Ca0.4MnO2 cathode material.


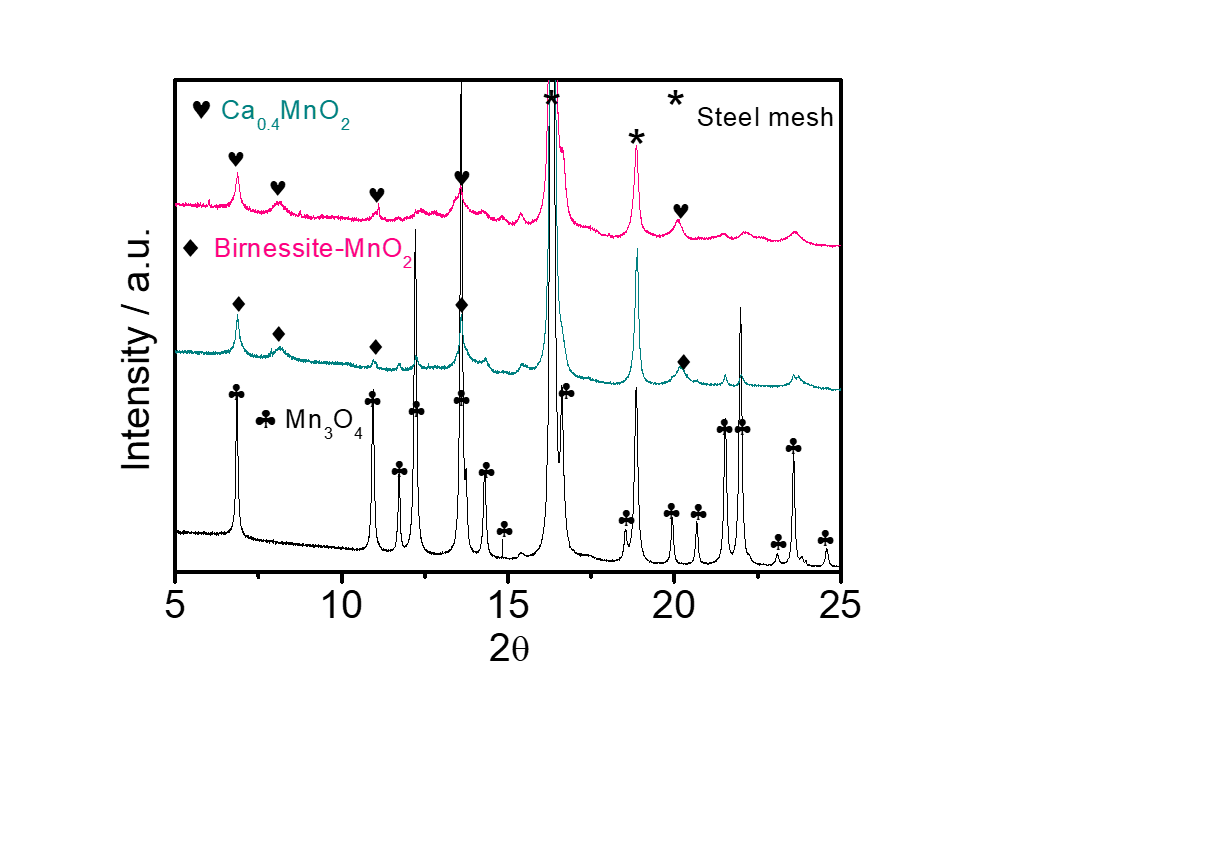


**Supplementary Figure 18.** The synchrotron X–ray powder diffraction patterns of Mn3O4, birnessite MnO2 and Ca0.4MnO2.


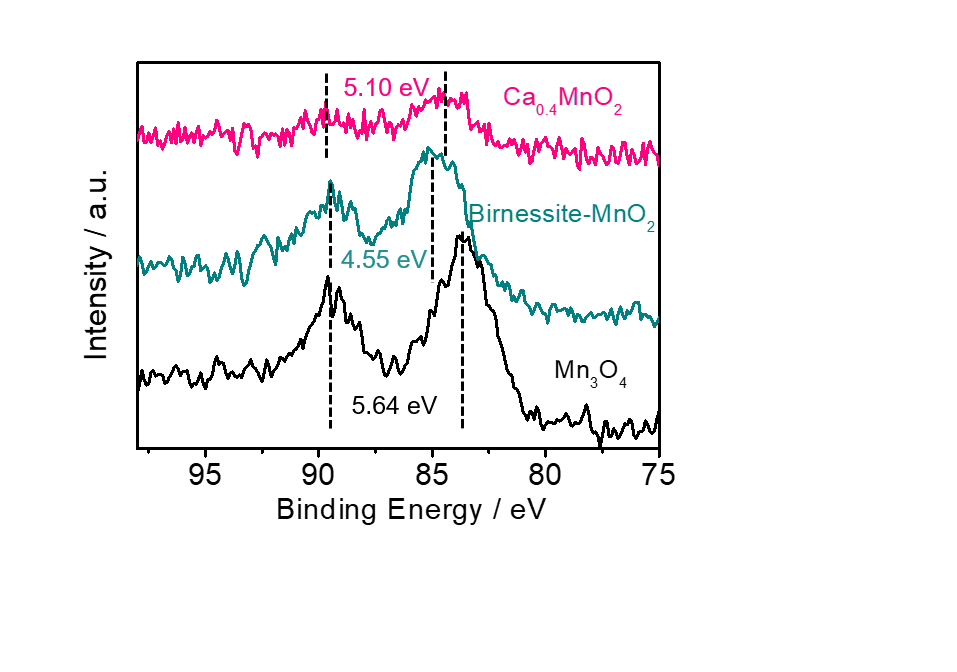


**Supplementary Figure 19.** The Mn 3s XPS spectra of the Mn3O4, birnessite MnO2 and Ca0.4MnO2.


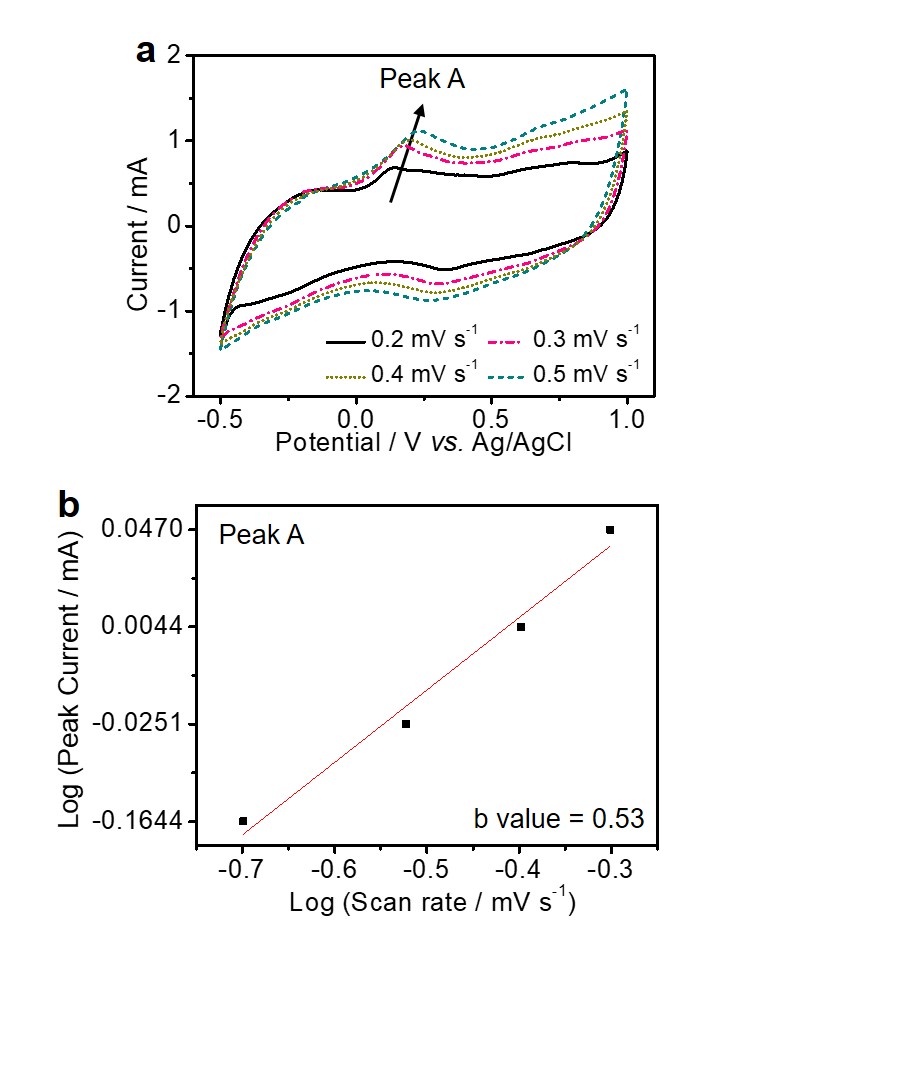


**Supplementary Figure 20.** **a** The CV curves of the Ca0.4MnO2 cathode collected at scan rates of 0.2~0.5 mV s–1. **b** Plot of log(peak current) as function of log(scan rate) obtained from Supplementary Figure 17a.

Supplementary Fig. 20a displays the CV curves of the cell at various scan rates from 0.2 to 0.5 mV s–1. From these CV curves, we can obtain a plot of log(peak current) as function of log(scan rate) based on equation (S1) and (S2)[6](#_ENREF_6):

*i* = a*ν*b (S1)

log(*i*) = blog(*ν*) + log(a) (S2)

where *i* is peak current, *ν* is scan rate, a and b are adjustable parameters. The value of b is determined by the slope in the log(*ν*)–log(*i*) plots. The b values in Supplementary Fig. 20b are calculated to be 0.53 for anodic peak, indicating that the capacity at peak voltage is dominated by the non–capacitive behaviour[6](#_ENREF_6),[7](#_ENREF_7).


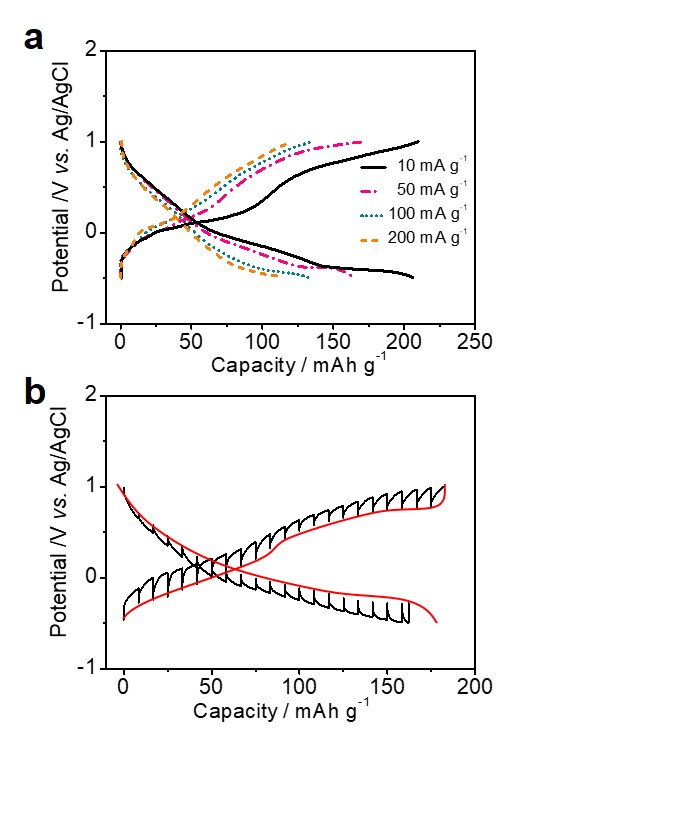


**Supplementary Figure 21.** **a** Voltage profiles of the Ca0.4MnO2 cathode in 8.37 m Ca(NO3)2 aqueous electrolyte at different current densities. **b** The GITT curves of the Ca0.4MnO2 cathode.


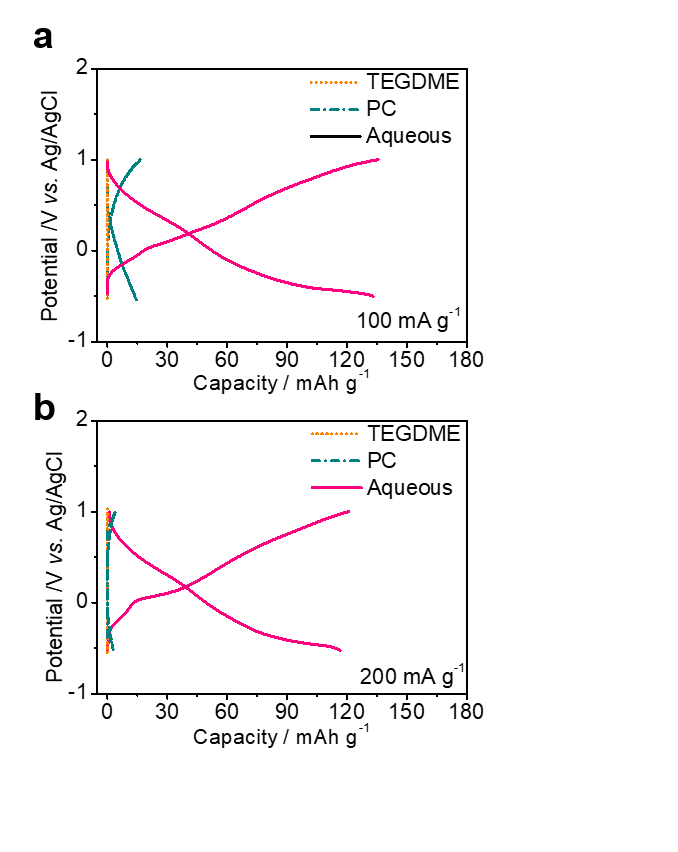


**Supplementary Figure 22.** Voltage profiles of the Ca0.4MnO2 cathode tested in 0.5 m Ca(OTf)2 in TEGDME, 0.5 m Ca(OTf)2 in PC, and 8.37 m Ca(NO3)2 aqueous electrolytes at **a** current density of 100 mA g–1 and **b** 200 mA g–1.


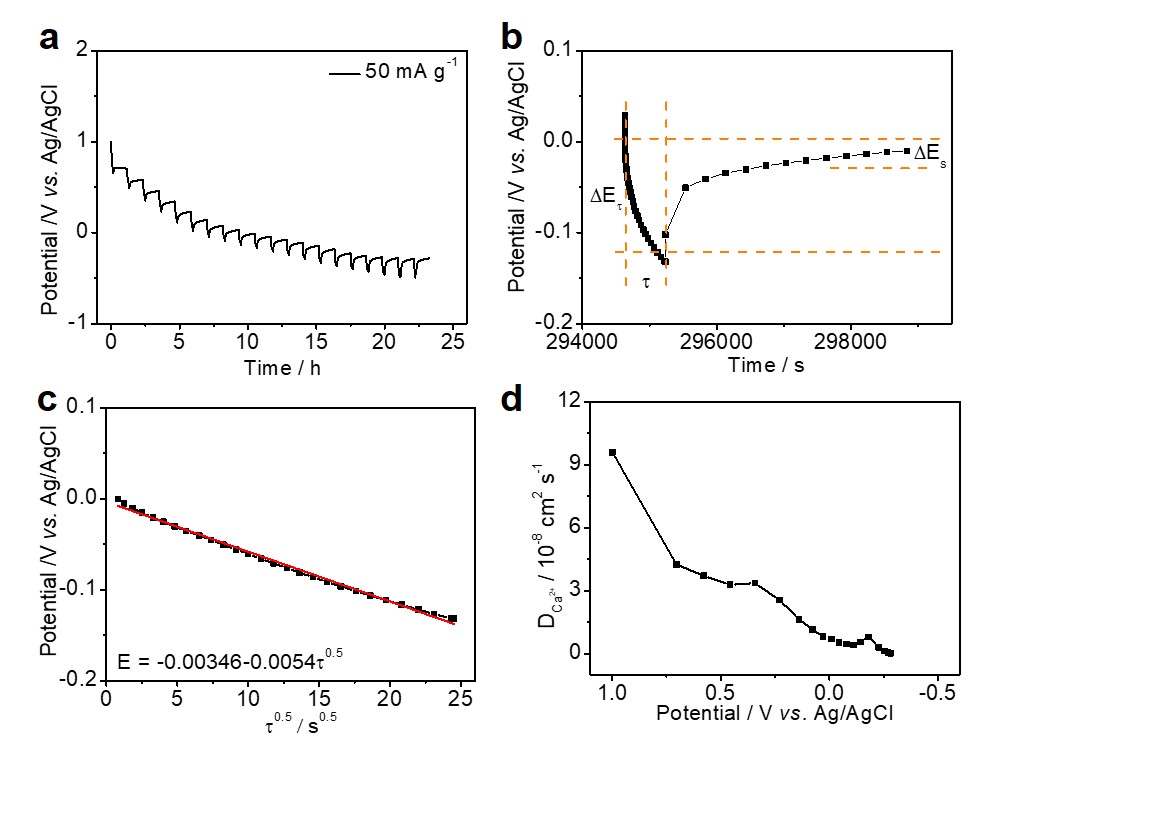


**Supplementary Figure 23.** Characterization of the Ca2+ diffusion co–efficiency in Ca0.4MnO2 cathode. **a–b** GITT curves of the Ca0.4MnO2 cathode. **c** Plot of potential as function of τ0.5 obtained from Supplementary Fig. 23b. **d** Plot of Ca2+ diffusion co–efficiency as function of potential.

Galvanostatic intermittent titration technique (GITT) has been applied to examine the Ca2+ diffusion in the Ca0.4MnO2 cathode materials. The obtained GITT curve of Ca0.4MnO2 cathode is shown in Supplementary Fig. 21b and 23a. The can be obtained via the following equation[8](#_ENREF_8),[9](#_ENREF_9):

(S3)

where the weight of active material (*i. e.* Ca0.4MnO2), 𝑚B, is 10.24 mg, and molar mass (𝑀B)/molar volume (𝑉M) are calculated to be about 3.4[10](#_ENREF_10). 𝑆 is the contact area between electrolyte and electrode, which is approximated as the surface area of electrode (0.385 cm2). 𝛥𝐸s is IR drop and 𝛥𝐸τ is the potential change in the time range of τ (s) during the discharge process (Supplementary Fig. 23b). As shown in Supplementary Fig. 23c, τ0.5 shows a good linear relationship with potential, which is the pre–condition of the equation S3. The Ca2+ diffusion co–efficiency is as high as 9.58 10–8 at 1 V *vs.* Ag/AgCl, domanstrating a rapid Ca2+ diffusion in the layered MnO2. This value slightly decreases to 1.23 10–10 at –0.29 V, which is asbribed to the intercalation of Ca2+ into the layered structure of cathode materials.


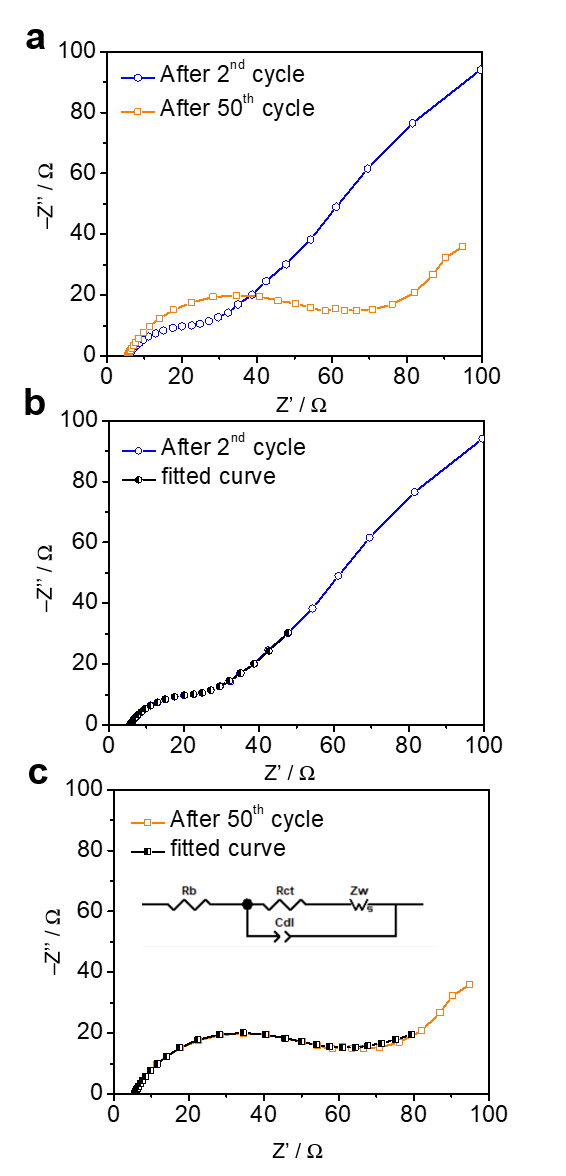


**Supplementary Figure 24.** **a** The EISs of the Ca0.4MnO2 cathode after different cycles. **b–c** The fitted EIS curves of the as–prepared Ca0.4MnO2 cathode based on an equivalent circuit shown as inset[11](#_ENREF_11),[12](#_ENREF_12).

EIS is applied to evaluate the interfacial stability of the cathode after different cycles. Supplementary Fig. 24 presents the Nyquist plots of the cathode materials after 2nd cycle and 50th cycle. The Nyquist plots exhibit a semicircle in the high–frequency region and a slope line at the low–frequency region. The slope line with an angle of about 45° suggests the diffusion–control process. The diameter of semicircles reflects the charge–transfer resistance (*Rct*) between electrolyte and cathode materials. Additionally, the intercept at real axis represents the bulk resistance (*Rb*)[11](#_ENREF_11),[12](#_ENREF_12). Only a small increase of *Rct* from 20 to 60 Ω is observed after 50 cycles. These EIS results further confirm the good interfacial stability of the cathode electrode.


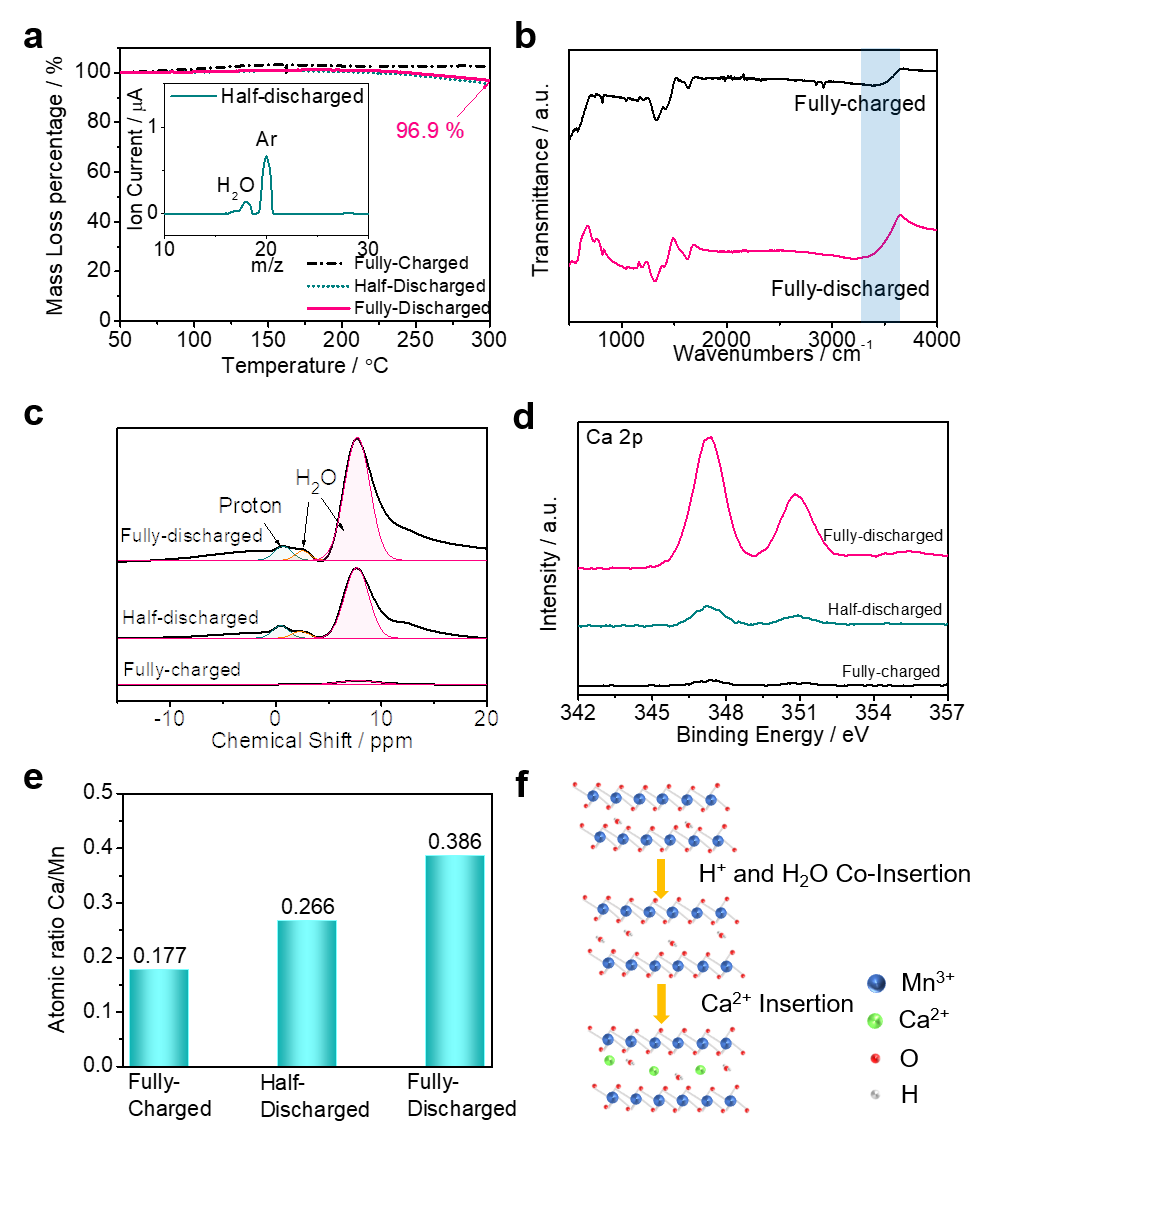


**Supplementary Figure 25.** H+/Ca2+ co–intercalation chemistry in Ca0.4MnO2 cathode in aqueous gel electrolyte.The cathode samples were pre–heated at 80 °Cfor one day before characterizations. **a** The TGA curves of the Ca0.4MnO2 cathode materials after discharge to different states of charge at 100 mA g–1 at under Ar flow. The inset is the mass spectrum of the evaporating gas flow from the cathode at the half–discharged state. **b** The FTIR spectra of thecathode materials at fully–charged and fully–discharged states. **c** 1HSSNMR spectra of the cathode materials at different states of charge. **d** XPSspectraof the cathode materials at different states of charge. **e** The Ca/Mn atomic ratio of the cathode materials at different states of charge according to the ICP results. **f** Schematic illustration the electrochemical mechanism of the Ca0.4MnO2 cathode.

We employed multiple characterization methods to clarify the cation intercalation/de–intercalation mechanism of Ca0.4MnO2 cathode in aqueous gel electrolyte. According to the thermogravimetry analysis (TGA) in Supplementary Fig. 25a, the mass loss in the range from 150 ~300 oC is attributed to the evaporation of lattice water molecules, which is confirmed by the mass spectrum result shown in the inset of Supplementary Fig. 25a[13](#_ENREF_13). During the discharge process, the lattice water content of cathode increases to 3.1 % in the fully–discharged state, indicating the co–insertion of water molecules. This is consistent with the Fourier–transform infrared spectroscopy (FTIR) results (Supplementary Fig. 25b**)**,in which the peak at 3500 cm–1 ascribed to the aggregated H2O molecules becomes stronger after the discharge process[14](#_ENREF_14). Additionally, as seen from the 1H solid state nuclear magnetic resonance (SSNMR) spectra in Supplementary Fig. 25c, the peak at ≈1.0 ppm can be attributed to the co–intercalated proton in the cathode lattice, meanwhile the peaks at ≈2.5 and 7.2 ppm are assigned to the inserted H2O molecules[15](#_ENREF_15),[16](#_ENREF_16). The intensities of both the proton and H2O peaks gradually increase during the discharge process, demonstrating the co–intercalation of protons into the cathode lattice.

Furthermore, XPS measurements were also conducted on the Ca0.4MnO2 cathodes after cycled in the aqueous gel electrolyte. We find that the intensity of the Ca2+ peak at 347.4 and 350.8 eV gradually increases during the discharge process of cathode (Supplementary Fig. 25d), and the calculated specific capacity generated from the reversible intercalation of Ca2+ in the cathode is ≈ 109 mAh g–1 based on the Ca/Mn atomic ratio change from the inductively coupled plasma (ICP) results (Supplementary Fig. 25e). According to above discussions, the electrochemical mechanism of Ca0.4MnO2 cathode is presented in Supplementary Fig. 25f.During the discharge process, protons and H2O molecules first co−insert into the lattice, which contributes a small proportion of the capacity. Particularly, the presence of water molecules in the cathode lattice efficiently decreases the cation diffusion barrier, thus improving the kinetics of batteries[17](#_ENREF_17). As a result, the Ca2+ ions can reversibly intercalate into the cathode during the discharge process with improved kinetics, which contributes a major proportion of the total capacity (≈ 80.7 %). This mechanism has been proved by the recent operando pH measurements for aqueous multivalent ion batteries by S. Passerini *et al.*[*18*](#_ENREF_18)*.* This confirms that protons and multivalent metal cations co-participate in the co–intercalation process and the reversible insertion/extraction of multivalent metal cations in the manganese oxide cathodes makes a major contribution to the battery capacities.


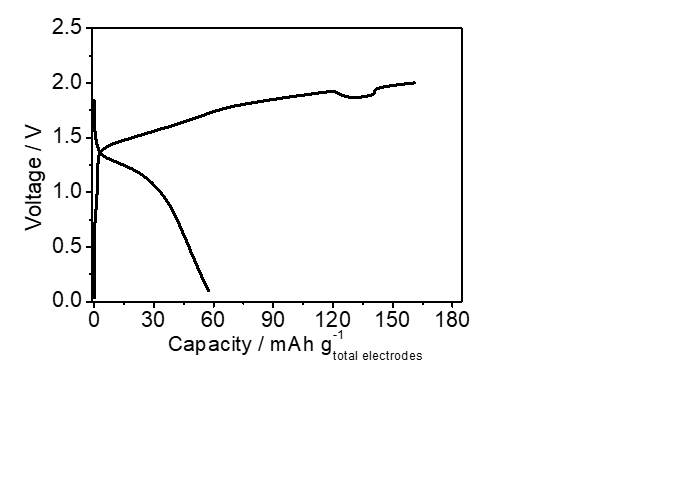


**Supplementary Figure 26.** The pre–activated charge/discharge profile of S@C||Ca0.4MnO2 full cells assembled with gel electrolyte at 0.5 C.


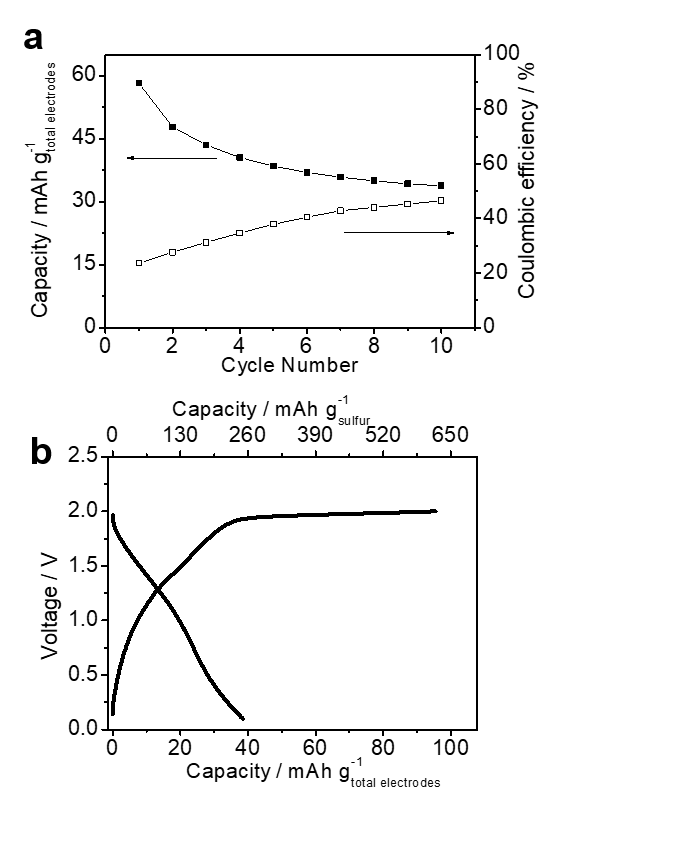


**Supplementary Figure 27.** **a** The cycling stability of the full cells at a current density of 0.1 C. **b** The voltage profile of the S@C||Ca0.4MnO2 full cells assembled with 1 m Ca(NO3)2 electrolytes at 0.1 C.


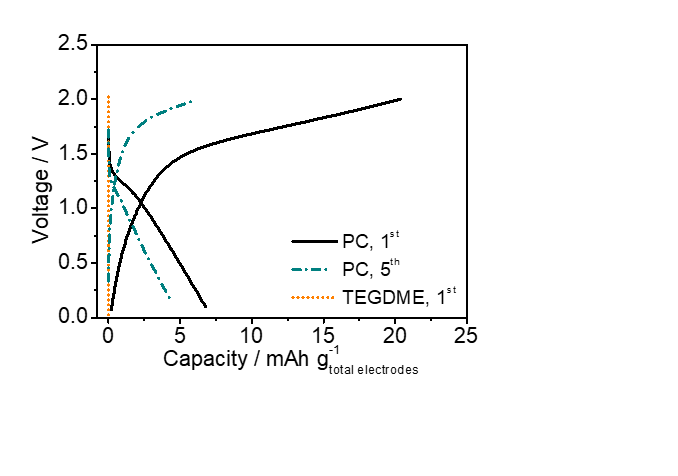


**Supplementary Figure 28.** Voltage profiles of the S@C|0.5 M Ca(OTf)2 in TEGDME|Ca0.4MnO2 and S@C|0.5 M Ca(OTf)2 in PC|Ca0.4MnO2 cells at different cycles at 0.5 C rate. The cell S@C||Ca0.4MnO2 cell cannot be cycled in the TEGDME–based electrolyte.


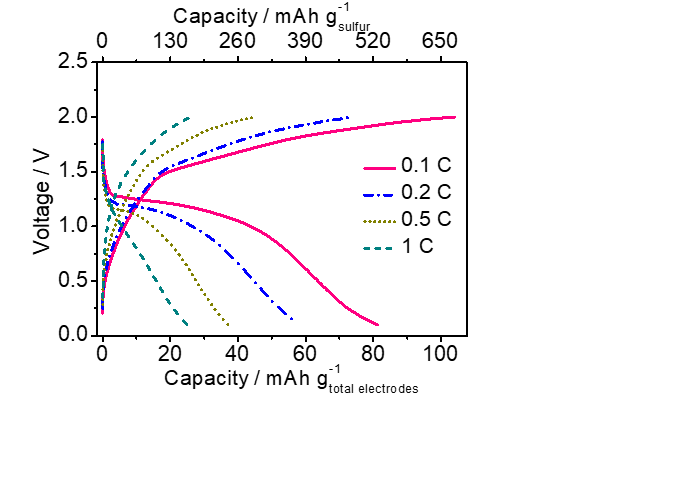


**Supplementary Figure 29**. The voltage profiles of the S@C||Ca0.4MnO2 full cells assembled with 8.37 m Ca(NO3)2 electrolytes.


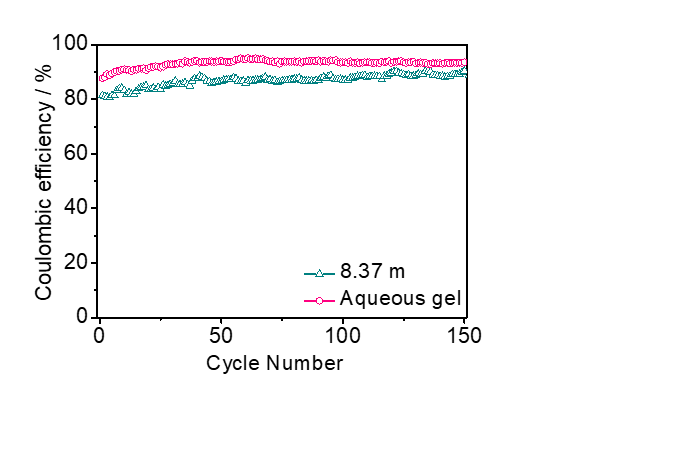


**Supplementary Figure 30**. The Coulombic efficiency of the S@C||Ca0.4MnO2 full cells assembled with different electrolytes at 0.2 C.


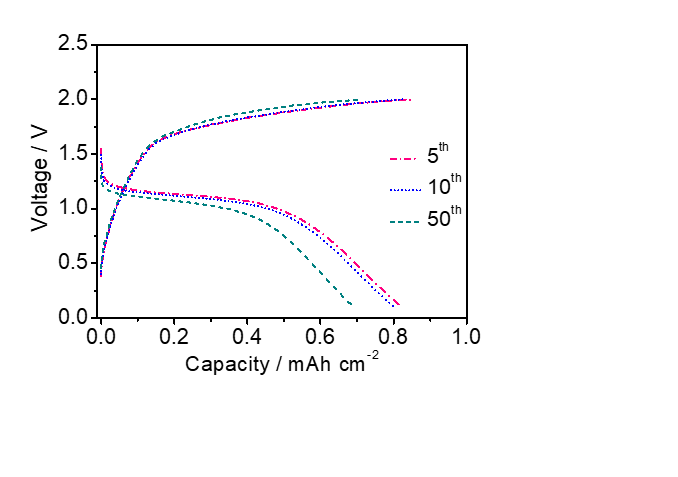


**Supplementary Figure 31**. The voltage profiles of the S@C|gel electrolyte|Ca0.4MnO2 pouch cell during 50 cycles at 0.2 C. The mass ratio of Ca0.4MnO2 cathode to S@C anode is about 1.6: 1.


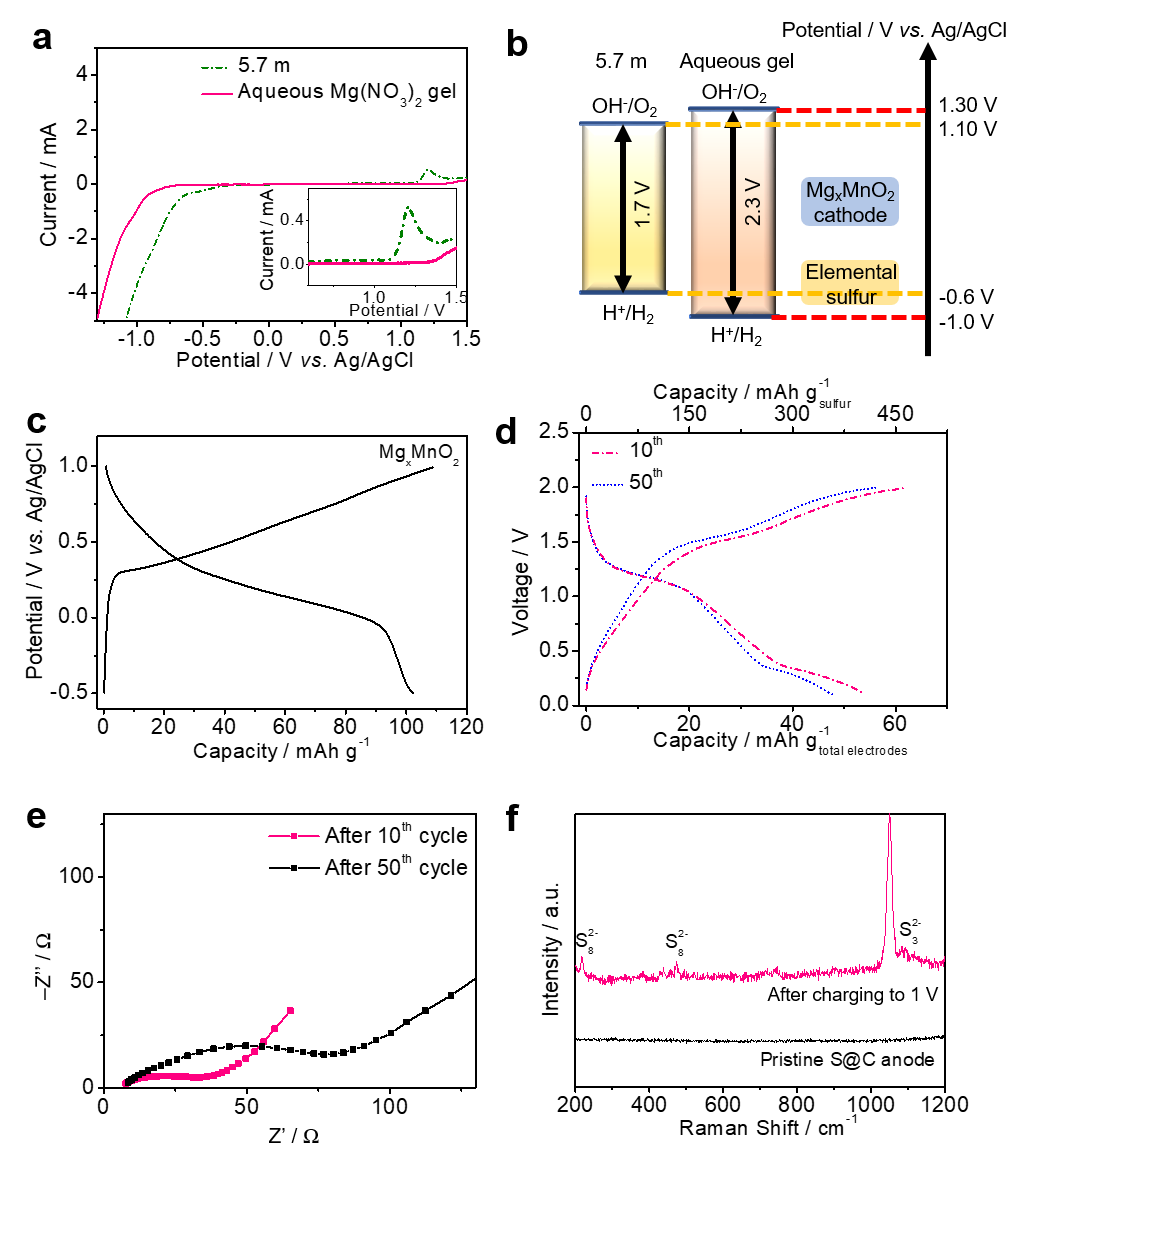


**Supplementary Figure 32**. The performances of the aqueous Mg ion–sulfur||metal oxide batteries. **a** Linear voltammetry curves recorded at 1 mV s–1 in saturated (5.7 m) Mg(NO3)2 electrolyte, and saturated Mg(NO3)2 aqueous solution with 10 wt% PVA gel electrolyte (aqueous Mg(NO3)2 gel electrolyte). A magnified view of the region outlined near the cathodic extreme is shown in inset. **b** The electrochemical stability windows of electrolytes, and the redox voltages of MgxMnO2 cathode and sulfur anode. **c** Voltage profiles of the MgxMnO2 cathode at a current density of 100 mA g–1. The MgxMnO2 cathode was prepared by pre–magnesiating the Mn3O4 electrodes by charging–discharging the electrochemical cell within a voltage window of –0.5~1.0 V *vs.* Ag/AgCl at 50 mA g–1 for 10 cycles in the presence of saturated aqueous Mg(NO3)2. The MgxMnO2 cathode can deliver a reversible capacity of about 100 mAh g–1. **d** The voltage profiles of S@C|aqueous Mg(NO3)2 gel electrolyte|MgxMnO2 cell at 0.2 C rate (1 C = 1675 mAh g–1 based on the sulfur mass). The aqueous cells were assembled following a same procedure as that of the ACSB with a mass ratio (cathodes to anodes) of about 2: 1. The full cell can deliver a reversible capacity of 360 mAh g–1 based on sulfur mass after 50 cycles. **e** The EISs of the S@C|aqueous Mg(NO3)2 gel electrolyte|MgxMnO2 cell after different cycles. The full cell maintains stable electrode|electrolyte interfaces with small resistance during cycling. **f** Raman spectra of pristine S@C anode, and the S@C anode disassembled from the S@C|aqueous Mg(NO3)2 gel electrolyte|MgxMnO2 cell after charging to 1 V. The Raman spectra confirm the conversion chemistry of sulfur anode in the aqueous Mg ion–sulfur||metal oxide batteries.


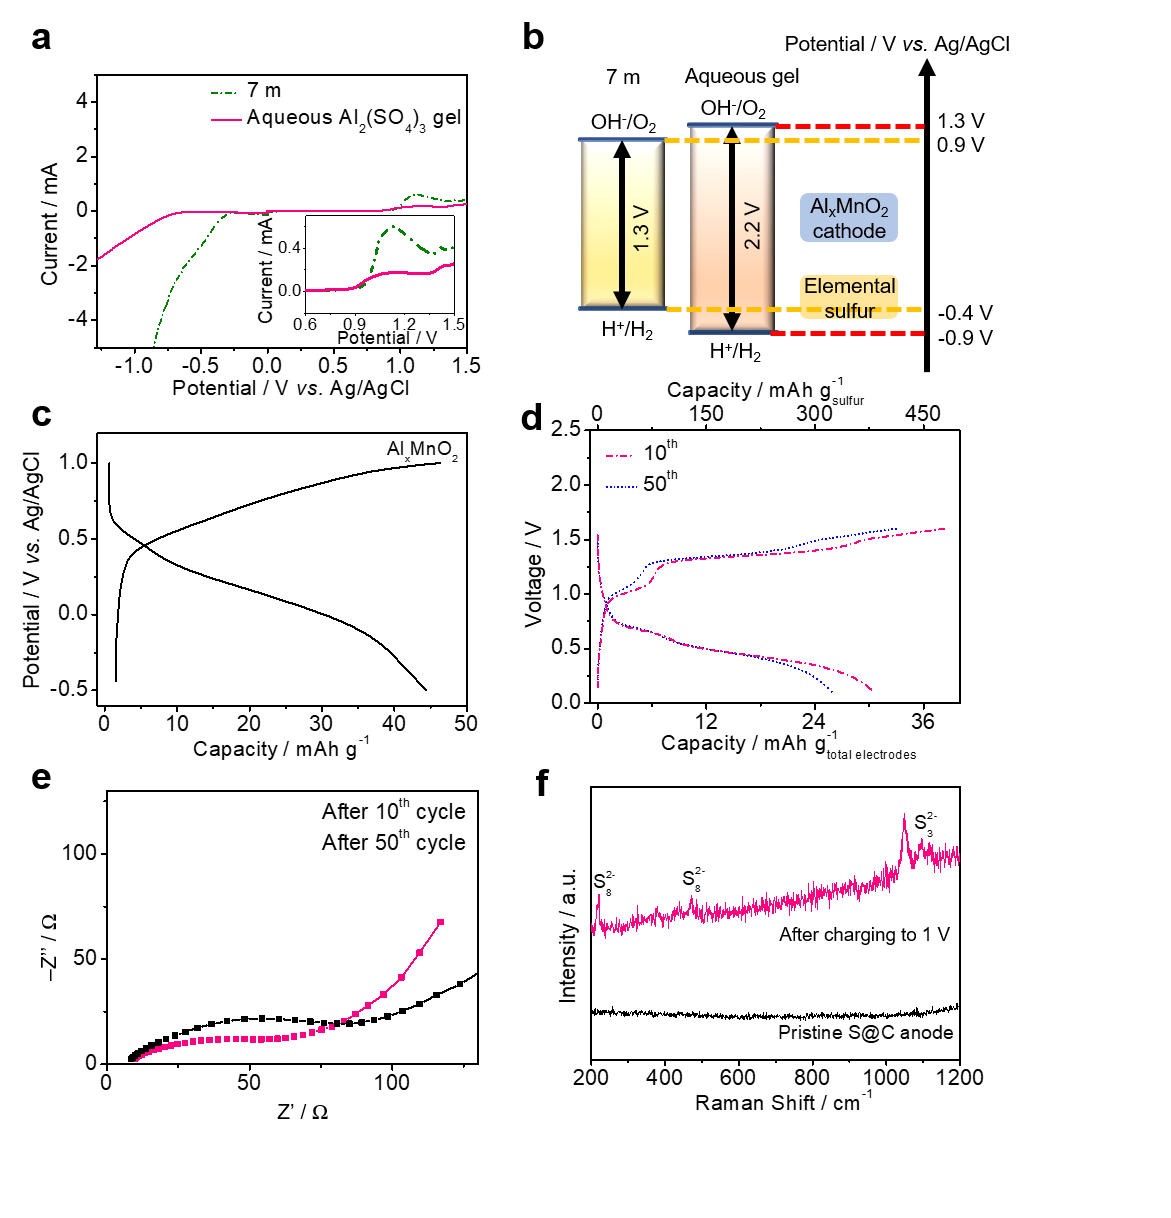


**Supplementary Figure 33**. The performances of the aqueous Al ion–sulfur||metal oxide batteries. **a** Linear voltammetry curves recorded at 1 mV s–1 in saturated (7 m) Al2(SO4)3 electrolyte, and saturated Al2(SO4)3 aqueous solution with 10 wt% PVA gel electrolyte (aqueous Al2(SO4)3 gel electrolyte). A magnified view of the region outlined near the cathodic extreme is shown in inset. **b** The electrochemical stability windows of electrolytes, and the redox voltages of AlxMnO2 cathode and sulfur anode. **c** Voltage profiles of the AlxMnO2 cathode at a current density of 100 mA g–1. The AlxMnO2 cathode was prepared by pre–aluminating the Mn3O4 electrodes by charging–discharging the electrochemical cell within a voltage window of –0.5~1.0 V *vs.* Ag/AgCl at 50 mA g–1 for 10 cycles in the presence of saturated aqueous Al2(SO4)3. The AlxMnO2 cathode can deliver a reversible capacity of about 45 mAh g–1. **d** The voltage profiles of S@C|aqueous Al2(SO4)3 gel electrolyte|AlxMnO2 cell at 0.2 C rate (1 C = 1675 mAh g–1 based on the sulfur mass). The aqueous cells were assembled following a same procedure as that of the ACSB with a mass ratio (cathodes to anodes) of about 4: 1. The full cell can deliver a reversible capacity of 315 mAh g–1 based on sulfur mass after 50 cycles. **e** The EISs of the S@C|aqueous Al2(SO4)3 gel electrolyte|AlxMnO2 cell after different cycles. The full cell maintains stable electrode|electrolyte interfaces with small resistance during cycling. **f** Raman spectra of pristine S@C anode, and the S@C anode disassembled from the S@C|aqueous Al2(SO4)3 gel electrolyte|AlxMnO2 cell after charging to 1 V. The Raman spectra confirm the conversion chemistry of sulfur anode in the aqueous Al ion–sulfur||metal oxide batteries.


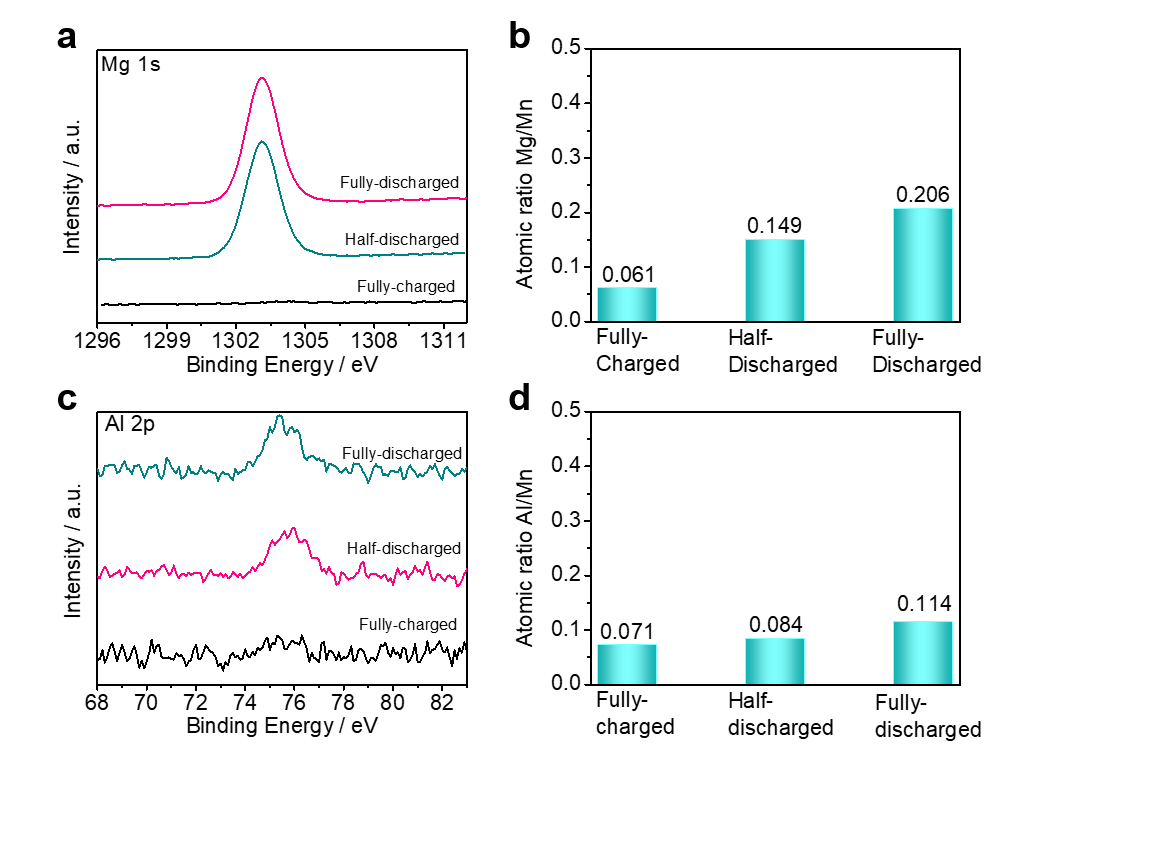


**Supplementary Figure 34. a** The XPS spectra of the MgxMnO2 cathode at different states of charge. **b** The atomic ratio of Mg and Mn according to ICP results. **c** The XPS spectra of the AlxMnO2 cathode at different states of charge. **d** The atomic ratio of Al and Mn according to ICP results. The cathode samples were pre–heated at 80 °Cfor one day before characterizations.

**Supplementary Tables**

**Supplementary Table S1**. Force field parameters used for Ca(NO3)2 aqueous solution in molecular dynamics simulations.

| Atom type | Charge (e) | σ (Å) | ε (kcal mol–1) |
| --- | --- | --- | --- |
| H | 0.4238 | 0 | 0 |
| O (water) | –0.8476 | 3.166 | 0.1553 |
| Ca | 1.5 | 2.412 | 0.450 |
| O (NO3–) | –0.4485 | 2.771 | 0.1456 |
| N | 0.5955 | 3.059 | 0.08066 |

The compositions of simulated electrolytes are given in the following table. The velocity–Verlet algorithm is applied to integrate the equations of motion with a time step equalled to 1 fs. First, NPT runs were performed at 500 K for 2 ns and then 298 K for 7 ns to ensure that the equilibrium salt dissociation had been reached. Then, the NPT runs were controlled by Nose–Hooven thermostat and barostat with a 100 fs damping parameter. Then, the NVT runs were 10 ns long at 298K. At this state, all simulated systems were surely equilibrated. The hydrogen bonds are defined by a distance cutoff of 3.5 Å and an angle cutoff of 30°.

**Supplementary Table S2**. Compositions of simulated electrolytes.

|  | 1 m Ca(NO3)2 | Sat. Ca(NO3)2 | Gel electrolyte |
| --- | --- | --- | --- |
| Number of H2O per box | 1913 | 1434 | 1429 |
| Number of Ca(NO3)2 per box | 34 | 216 | 215 |
| Equilibrium volume(Å3) | 59822 | 62254 | 72715 |
| T(K) | 298 | 298 | 298 |
| MD, density(g cm–3) | 1.11 | 1.63 | 1.55 |

**Supplementary Table S3.** ICP results of the cathode material after electrochemical transformation.

|  | Ca | Mn |
| --- | --- | --- |
| Molar ratio | 0.398 | 1 |

**Supplementary References**

1 Zheng, J. *et al.* Understanding thermodynamic and kinetic contributions in expanding the stability window of aqueous electrolytes. *Chem* **4**, 2872-2882 (2018).

2 Liang, X. *et al.* A highly efficient polysulfide mediator for lithium–sulfur batteries. *Nat. Commun.* **6**, 1-8 (2015).

3 Franzen, H. F., Umaña, M. X., McCreary, J. & Thorn, R. XPS spectra of some transition metal and alkaline earth monochalcogenides. *J. Solid State Chem.* **18**, 363-368 (1976).

4 Cavell, R. G. & Sodhi, R. N. Absolute total static relaxation and extra-atomic relaxation terms for volatile phosphorus compounds obtained from the Auger parameter and relativistic. *J. Electron. Spectros. Relat. Phenomena* **41**, 25-35 (1986).

5 Manan, N. S. *et al.* Electrochemistry of sulfur and polysulfides in ionic liquids. *J. Phys. Chem. B* **115**, 13873-13879 (2011).

6 Brezesinski, T., Wang, J., Tolbert, S. H. & Dunn, B. Ordered mesoporous α-MoO3 with iso-oriented nanocrystalline walls for thin-film pseudocapacitors. *Nat. Mater.* **9**, 146-151 (2010).

7 Wang, J., Polleux, J., Lim, J. & Dunn, B. Pseudocapacitive contributions to electrochemical energy storage in TiO2 (anatase) nanoparticles. *J. Phys. Chem. C* **111**, 14925-14931 (2007).

8 Zhu, Y. & Wang, C. Galvanostatic intermittent titration technique for phase-transformation electrodes. *J. Phys. Chem. C* **114**, 2830-2841 (2010).

9 Dees, D. W., Kawauchi, S., Abraham, D. P. & Prakash, J. Analysis of the galvanostatic intermittent titration technique (GITT) as applied to a lithium-ion porous electrode. *J. Power Sources* **189**, 263-268 (2009).

10 Bach, S., Pereira-Ramos, J. & Baffier, N. A new MnO2 tunnel related phase as host lattice for Li intercalation. *Solid State Ionics* **80**, 151-158 (1995).

11 Zhang, X. *et al.* Rapid hydrothermal synthesis of hierarchical nanostructures assembled from ultrathin birnessite-type MnO2 nanosheets for supercapacitor applications. *Electrochim. Acta* **89**, 523-529 (2013).

12 Gao, H., Xiao, F., Ching, C. B. & Duan, H. High-performance asymmetric supercapacitor based on graphene hydrogel and nanostructured MnO2. *ACS Appl. Mater. Interfaces* **4**, 2801-2810 (2012).

13 Meija, J., Mester, Z. & D’Ulivo, A. Mass spectrometric separation and quantitation of overlapping isotopologues. H2O/HOD/D2O and H2Se/HDSe/D2Se mixtures. *J. Am. Soc. Mass Spectrom.* **17**, 1028-1036 (2006).

14 Scatena, L., Brown, M. & Richmond, G. Water at hydrophobic surfaces: Weak hydrogen bonding and strong orientation effects. *Science* **292**, 908-912 (2001).

15 Sa, N. *et al.* Is alpha-V2O5 a cathode material for Mg insertion batteries? *J. Power Sources* **323**, 44-50 (2016).

16 Fărcaşiu, D., Lukinskas, P. & Hâncu, D. The hydronium tetrafluoroborate dimer in nonpolar media and its proton NMR spectrum. *J. Mol. Model.* **6**, 171-176 (2000).

17 Wang, F. *et al.* How water accelerates bivalent ion diffusion at the electrolyte/electrode interface. *Angew. Chem. Int. Ed.* **57**, 11978-11981 (2018).

18 Liu, X. *et al.* Operando pH measurements decipher H+/Zn2+ intercalation chemistry in high-performance aqueous Zn/δ-V2O5 batteries. *ACS Energy Lett.* **5**, 2979-2986 (2020).
